# Supplementary material for: Hemoglobin-stabilized gold nanoclusters displaying oxygen transport ability, self-antioxidation, auto-fluorescence properties and long-term storage potential
Source: PubMed Central journal article supplement — RSC Adv. 2023 May 23;13(23):15540–53. doi: 10.1039/d3ra00689a (PMC10203863; doi:10.1039/d3ra00689a), 2023-05-23
Supplement: RA-013-D3RA00689A-s001.pdf [file RA-013-D3RA00689A-s001.pdf]

## Supporting Information

# Hemoglobin-stabilized gold nanoclusters displaying oxygen transport ability, self-antioxidant, auto-fluorescent properties and long-term storage potential

*Xingli Cun,<sup>a</sup> Michelle M. T. Jansman,<sup>a</sup> Xiaoli Liu,<sup>a</sup> Victor Boureau,<sup>b</sup> Peter W. Thulstrup<sup>c</sup> and Leticia Hosta-Rigau<sup>\*,a</sup>*

<sup>a</sup>DTU Health Tech, Center for Nanomedicine and Theranostics, Technical University of Denmark, Nils Koppels Allé, Building 423, 2800 Kgs. Lyngby, Denmark.

<sup>b</sup>Interdisciplinary Centre for Electron Microscopy (CIME), École Polytechnique Fédérale de Lausanne, CH-1015 Lausanne, Switzerland.

<sup>c</sup>Department of Chemistry, University of Copenhagen, Universitetsparken 5, 2100 Copenhagen, Denmark.

## **Synthesis and Characterization of Bovine Serum Albumin (BSA)-Stabilized Gold Nanoclusters (BSA@AuNCs)**

BSA@AuNCs was synthesized as previously reported.<sup>1</sup> Briefly, the aqueous solution of  $\text{HAuCl}_4 \cdot 3\text{H}_2\text{O}$  (2.5 mL, 10 mM, 37 °C) was added to BSA solution (2.5 mL, 50 mg mL<sup>-1</sup>, 37 °C) followed by stirring at 480 rpm, 37 °C for two minutes. Next, NaOH solution (0.25 mL, 1M, 37 °C) was introduced to the above reaction and vigorously stirred (480 rpm) for 12 h at 37 °C in a dark environment. Then the BSA@AuNCs were obtained and stored at 4 °C in the dark for future use.

The hydrodynamic size and polydispersity of BSA@AuNCs were measured with Malvern Zetasizer Nanoseries nano-ZS. The fluorescence spectra of BSA@AuNCs were recorded with a Tecan multimode microplate reader.

| Sample Name | Diameter (nm) | ζ-Potential (mV) |
|-------------|---------------|------------------|
| BSA         | 4.2 ± 0.11    | -6.8 ± 0.71      |
| BSA@AuNCs   | 4.8 ± 0.25    | -26.6 ± 2.28     |

**Table S1.** Size and zeta (ζ)-potential of free BSA and BSA@AuNCs.

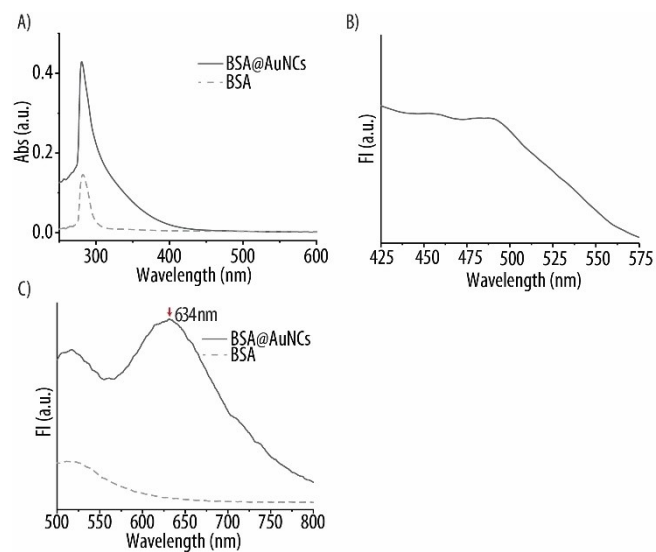

**Figure S1. Characterization of BSA@AuNCs.** A) UV-vis absorbance (Abs) spectra of BSA and BSA@AuNCs. B) Fluorescence intensity (FI) excitation spectrum of BSA@AuNCs. C) FI emission spectra of BSA and BSA@AuNCs when excited at 450 nm.

| Conformers                | Area (%) |          | Position (cm <sup>-1</sup> ) |                |
|---------------------------|----------|----------|------------------------------|----------------|
|                           | Hb       | Hb@AuNCs | Hb                           | Hb@AuNCs       |
| Intermolecular aggregates | 6.0      | 7.5      | 1618.3                       | 1618.4         |
| β-Sheet                   | 15.5     | 23.4     | 1630.1                       | 1629.6         |
| Random coils              | 25.3     | 28.4     | 1643.0                       | 1641.1         |
| α-Helix                   | 30.1     | 20.6     | 1655.4                       | 1653.3         |
| β-Turns                   | 15.3     | 13.8     | 1668.4                       | 1665.5         |
| Intramolecular aggregates | 7.7      | 6.3      | 1682.1                       | 1678.9, 1692.0 |

**Table S2.** Fitting parameters using a PeakFit software fitting technique of the Amide-I band for Hb and Hb@AuNCs.

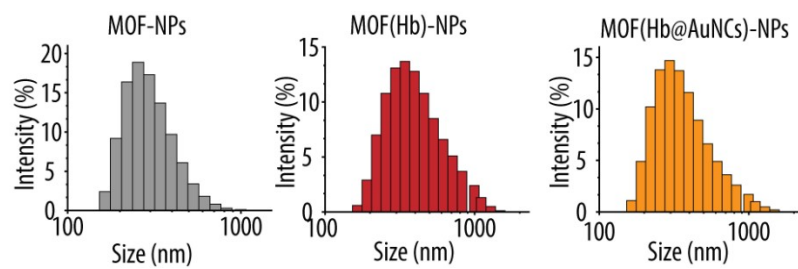

**Figure S2.** Size distribution of bare MOF-NPs, Hb-loaded MOF-NPs (MOF(Hb)-NPs) and Hb@AuNCs-loaded MOF-NPs (MOF(Hb@AuNCs)-NPs).

| <b>Z</b> | <b>Element</b> | <b>Family</b> | <b>Atomic Fraction (%)</b> | <b>Mass Fraction (%)</b> |
|----------|----------------|---------------|----------------------------|--------------------------|
| 6        | C              | K             | 62.67                      | 52.63                    |
| 7        | N              | K             | 13.02                      | 12.75                    |
| 8        | O              | K             | 10.78                      | 12.05                    |
| 9        | F              | K             | 7.08                       | 9.40                     |
| 13       | Al             | K             | 6.11                       | 11.53                    |
| 14       | Si             | K             | 0.19                       | 0.37                     |
| 26       | Fe             | K             | 0.09                       | 0.37                     |
| 79       | Au             | L             | 0.06                       | 0.89                     |

**Table S3.** Energy dispersive X-ray quantification of the elements in MOF(Hb@AuNCs)-NP.

## References

1. J. Xie, Y. Zheng and J. Y. Ying, *J. Am. Chem. Soc.*, 2009, **131**, 888–889.
